# Supplementary material for: Did genome duplication drive the origin of teleosts? A comparative study of diversification in ray-finned fishes
Source: PubMed Central journal article supplement (PMC2743667; doi:10.1186/1471-2148-9-194), 2009-08-08
Supplement: 1471-2148-9-194-S2.pdf [file 1471-2148-9-194-S2.pdf]

# Did genome duplication drive the origin of teleosts? A comparative study of diversification in ray-finned fishes

Francesco Santini, Luke J. Harmon, Giorgio Carnevale, Michael E. Alfaro

## Additional file 2 – GenBank accession numbers of sequences used in this study

**Table S1 - List of taxa and Rag1 GenBank accession numbers included in study.**

| GenBank sequence # | Taxon                           | Common name               | Family          | Order              | Lineage taxon belongs to in Fig. 4 |
|--------------------|---------------------------------|---------------------------|-----------------|--------------------|------------------------------------|
| AF135482           | <i>Carcharodon carcharias</i>   | Great white shark         | Lamnidae        | Lamniformes        |                                    |
| AY462188           | <i>Mustelus asterias</i>        | Starry smooth-hound shark | Triakidae       | Carchariniformes   |                                    |
| AY442926           | <i>Lepidosiren paradoxa</i>     | South American lungfish   | Lepidosirenidae | Lepidosireniformes |                                    |
| AY442928           | <i>Protopterus dolloi</i>       | African lungfish          | Protopteridae   |                    |                                    |
| AY442927           | <i>Neoceratodus forsteri</i>    | Australian lungfish       | Ceratodontidae  | Ceratodontiformes  |                                    |
|                    | <i>Latimeria chalumnae</i>      | Coelacanth                | Latimeriidae    | Coelacanthiformes  |                                    |
| AY442925           | <i>Latimeria menadoensis</i>    | Coelacanth                |                 |                    |                                    |
| AF369055           | <i>Polypterus sp.</i>           | Bichir                    | Polypteridae    | Polypteriformes    | Polypteriformes                    |
| AF369058           | <i>Lepisosteus osseus</i>       | Longnose gar              | Lepisosteidae   | Lepisosteiformes   | Holostei                           |
| AY430199           | <i>Amia calva</i>               | Bowfin                    | Amiidae         | Amiiformes         | Holostei                           |
| AF369056           | <i>Acipenser sp.</i>            | sturgeon                  | Acipenseridae   | Acipenseriformes   | Chondrostei                        |
| AY430198           | <i>Scaphirhynchus albus</i>     | Pallid sturgeon           |                 |                    |                                    |
| U15613             | <i>Polyodon spathula</i>        | Mississippi paddlefish    | Polyodontidae   |                    |                                    |
| AF369057           |                                 |                           |                 |                    |                                    |
| AY430200           | <i>Hiodon alosoides</i>         | Goldeye                   | Hiodontidae     | Osteoglossiformes  | Osteoglossomorpha                  |
| AF369062           | <i>Gnathonemus sp.</i>          | Elephantfishes            | Mormyridae      |                    |                                    |
| AF369063           | <i>Notopterus notopterus</i>    | Bronze featherback        | Notopteridae    |                    |                                    |
| AY430201           | <i>Osteoglossum bicirrhosum</i> | Arawana                   | Osteoglossidae  |                    |                                    |
| AF369061           | <i>Pantodon buchholzi</i>       | Freshwater butterflyfish  | Pantodontidae   |                    |                                    |
| AY430202           | <i>Albula vulpes</i>            | Bonefish                  | Albulidae       | Albuliformes       | Elopomorpha                        |

|          |                                   |                         |                  |                  |                  |
|----------|-----------------------------------|-------------------------|------------------|------------------|------------------|
| AY430204 | <i>Megalops atlanticus</i>        | Tarpon                  | Megalopidae      | Elopiformes      |                  |
| AY430203 | <i>Ophichthus gomesii</i>         | Shrimp eel              | Ophichthidae     |                  |                  |
| DQ912115 | <i>Alosa pseudoharengus</i>       | Alewife                 | Clupeidae        | Clupeiformes     | Clupeomorpha     |
| DQ912118 | <i>Clupea pallasii</i>            | Pacific herring         |                  |                  |                  |
| DQ912100 | <i>Denticeps clupeoides</i>       | Denticle herring        | Denticipitidae   |                  | Denticipitidae   |
| DQ912108 | <i>Anchoa delicatissima</i>       | Slough anchovy          | Engraulidae      |                  | Clupeomorpha     |
| AY430205 | <i>Engraulis japonicus</i>        | Japanese anchovy        |                  |                  |                  |
| AY430206 | <i>Pellona flavipinnis</i>        | Yellowfin river pellona | Pristigasteridae |                  |                  |
| AY430212 | <i>Catoprion mento</i>            | Wimple piranha          | Characidae       | Characiformes    | Characiformes    |
| AY430211 | <i>Gnathocharax steindachneri</i> |                         |                  |                  |                  |
| DQ492425 | <i>Distichodus notospilus</i>     |                         | Citharinidae     |                  |                  |
| DQ912097 | <i>Hepsetus odoe</i>              | Kafue pike              | Hepsetidae       |                  |                  |
| U15614   | <i>Carassius auratus</i>          | Goldfish                | Cyprinidae       | Cypriniformes    | Cypriniformes    |
| U71093   | <i>Danio rerio</i>                | Zebrafish               |                  |                  |                  |
| AY059468 | <i>Hesperoleucus symmetricus</i>  | California roach        |                  |                  |                  |
| AY059469 | <i>Lavinia exilicauda</i>         | Hitch                   |                  |                  |                  |
| AY430210 | <i>Pimephales promelas</i>        | Fathead minnow          |                  |                  |                  |
| AY430207 | <i>Chanos chanos</i>              | Milkfish                | Chanidae         | Gonorynchiformes | Gonorynchiformes |
| AY359225 | <i>Gymnotus sp.</i>               | Knifefish               | Gymnotidae       | Gymnotiformes    | Gymnotiformes    |
| DQ492426 | <i>Sternopygus sp.</i>            | Glass knifefishes       | Sternopygidae    |                  |                  |
| DQ492524 | <i>Bagre marinus</i>              | Gafftopsail sea catfish | Ariidae          | Siluriformes     | Siluriformes     |
| DQ492527 | <i>Galeichthys peruvianus</i>     | Peruvian sea catfish    |                  |                  |                  |
| DQ492458 | <i>Bagrus docmak</i>              | Semutundu               | Bagridae         |                  |                  |
| DQ492457 | <i>Leiocassis poecilopterus</i>   |                         |                  |                  |                  |
| DQ492436 | <i>Callichthys callichthys</i>    | Cascarudo               | Callichthyidae   |                  |                  |
| DQ492437 | <i>Corydoras trilineatus</i>      | Threestripe corydoras   |                  |                  |                  |
| DQ492521 | <i>Clarias batrachus</i>          | Walking catfish         | Clariidae        |                  |                  |
| DQ492520 | <i>Heterobranchus longifi</i>     | Vundu                   |                  |                  |                  |
| DQ492514 | <i>Cranoglanis boudierus</i>      |                         | Cranoglanididae  |                  |                  |
| DQ492428 | <i>Diplomystes mesembrinus</i>    |                         | Diplomystidae    |                  |                  |
| DQ492466 | <i>Acanthodoras cataphractus</i>  | Spiny catfish           | Doradidae        |                  |                  |
| DQ492468 | <i>Leptodoras linnelli</i>        |                         |                  |                  |                  |
| AY430209 | <i>Ameiurus nebulosus</i>         | Brown bullhead          | Ictaluridae      |                  |                  |
| DQ492511 | <i>Ictalurus punctatus</i>        | Channel catfish         |                  |                  |                  |
| AY552046 | <i>Ancistrus sp.</i>              | Armored catfishes       | Loricaridae      |                  |                  |
| DQ492441 | <i>Farlowella nattereri</i>       | Armored catfishes       |                  |                  |                  |
| AY552038 | <i>Hypostomus latifrons</i>       | Armored catfishes       |                  |                  |                  |

|           |                                     |                               |                   |                 |                 |  |
|-----------|-------------------------------------|-------------------------------|-------------------|-----------------|-----------------|--|
| DQ492443  | <i>Liposarcus multiradiatus</i>     | Armored catfishes             |                   |                 |                 |  |
| DQ492498  | <i>Malapterurus tanganyikaensis</i> |                               | Malapteruridae    |                 |                 |  |
| DQ492495  | <i>Synodontis batesii</i>           | Upsidedown catfish            | Mochokidae        |                 |                 |  |
| DQ492474  | <i>Hypophthalmus edentatus</i>      | Highwaterman catfish          | Pimelodidae       |                 |                 |  |
| DQ492476  | <i>Phractocephalus hemioliopus</i>  | Redtail catfish               |                   |                 |                 |  |
| DQ492475  | <i>Pimelodus ornatus</i>            |                               |                   |                 |                 |  |
| DQ492473  | <i>Batrochoglanis raninus</i>       |                               | Pseudopimelodidae |                 |                 |  |
| DQ492472  | <i>Pseudopimelodus mangurus</i>     |                               |                   |                 |                 |  |
| DQ492507  | <i>Pareutropius debauwi</i>         | African glass catfish         | Schilbeidae       |                 |                 |  |
| DQ492508  | <i>Schilbe intermedius</i>          | Silver catfish                |                   |                 |                 |  |
| DQ492486  | <i>Kryptopterus minor</i>           |                               | Siluridae         |                 |                 |  |
| AY552051  | <i>Silurus glanis</i>               | Wels catfish                  |                   |                 |                 |  |
| DQ492446  | <i>Bagarius yarrelli</i>            | Goonch                        | Sisoridae         |                 |                 |  |
| DQ492431  | <i>Trichomycterus guianense</i>     | Pencil or parasitic catfishes | Trichomycteridae  |                 |                 |  |
| AY380542  | <i>Esox lucius</i>                  | Northern pike                 | Esocidae          | Esociformes     | Esociformes     |  |
| AY380540  | <i>Dallia pectoralis</i>            | Alaska blackfish              | Umbridae          |                 |                 |  |
| AY380546  | <i>Novumbra hubbsi</i>              | Olympic mudminnow             |                   |                 |                 |  |
| AY380549  | <i>Umbra pygmae</i>                 | Eastern mudminnow             |                   |                 |                 |  |
| AY430228  | <i>Argentina sialis</i>             | North-Pacific argentine       | Argentinidae      | Argentiniformes | Argentiniformes |  |
| AY443564  | <i>Bathylagus ochotensis</i>        | Eared blacksmelt              | Bathylagidae      |                 |                 |  |
| AY430219  | <i>Brachygalaxias bullocki</i>      | Galaxias                      | Galaxiidae        | Galaxiiformes   | Galaxiiformes   |  |
| AY430218  | <i>Galaxias fasciatus</i>           | Banded kokopu                 |                   |                 |                 |  |
| AY380538  | <i>Hypomesus olidus</i>             | Pond smelt                    | Osmeridae         | Osmeriformes    | Osmeriformes    |  |
| AY430215  | <i>Spirinchus thaleichthy</i>       | Longfin smelt                 |                   |                 |                 |  |
| AY380537  | <i>Thaleichthys pacificus</i>       | Eulachon                      |                   |                 |                 |  |
| AY380536  | <i>Plecoglossus altivelis</i>       | Ayu                           | Plecoglossidae    |                 |                 |  |
| AY430216  | <i>Retropinna tasmanica</i>         | Tasmanian smelt               | Retropinnidae     |                 |                 |  |
| AY430217  | <i>Stokellia anisodon</i>           | Stokell's smelt               |                   |                 |                 |  |
| AY380539  | <i>Salangichthys microdon</i>       | Japanese icefish              | Salangidae        |                 |                 |  |
| U15663    | <i>Oncorhynchus mykiss</i>          | Rainbow trout                 | Salmonidae        | Salmoniformes   | Salmoniformes   |  |
| AY430213  | <i>Prosopium williamsoni</i>        | Mountain whitefish            |                   |                 |                 |  |
| AY380535  | <i>Salvelinus malma</i>             | Dolly varden                  |                   |                 |                 |  |
| AY430214  | <i>Thymallus thymallus</i>          | Grayling                      |                   |                 |                 |  |
| AY438703  | <i>Gonostoma bathyphilum</i>        | Bristlemouths                 | Gonostomatidae    | Stomiiformes    | Stomiiformes    |  |
| AY442363  | <i>Vinciguerra sp.</i>              | Lightfishes                   | Phosichthyidae    |                 |                 |  |
| AY430220* | <i>Chlorophthalmus agassizi</i>     | Greeneyes                     | Chlorophthalmidae | Aulopiformes    | Aulopiformes    |  |

|          |                                    |                         |                  |                    |                              |
|----------|------------------------------------|-------------------------|------------------|--------------------|------------------------------|
| AY308763 | <i>Synodus intermedius</i>         | Sand diver              | Synodontidae     |                    |                              |
| AY430221 | <i>Notoscopelus kroyeri</i>        | Lancet fish             | Myctophidae      | Myctophiformes     | Myctophiformes               |
| AY308764 | <i>Lampris guttatus</i>            | Opah                    | Lampridae        | Lampriformes       | Lampriformes                 |
| AY430222 | <i>Regalecus glesne</i>            | King of herrings        | Regalecidae      |                    |                              |
| AY308765 | <i>Polymixia japonica</i>          | Silver eye              | Polymixiidae     | Polymixiiformes    | Polymixiiformes              |
| EF033043 | <i>Neobythites stigmus</i>         |                         | Ophidiidae       | Ophidiiformes      | Ophidiiformes                |
| AY308782 | <i>Petrotyx sanguineus</i>         | Redfin brotula          |                  |                    |                              |
| AY308766 | <i>Percopsis transmontana</i>      | Sand roller             | Percopsidae      | Percopsiformes     | Percopsiformes + Gadiiformes |
| EF095636 | <i>Beryx splendens</i>             | Splendid alfonso        | Berycidae        | Beryciformes       | Beryciformes                 |
| AY430223 | <i>Sargocentron punctatissimum</i> | Speckled squirrelfish   | Holocentridae    |                    |                              |
| AY308770 | <i>Sargocentron vexillarium</i>    | Dusky squirrelfish      |                  |                    |                              |
| EF095635 | <i>Hoplostethus mediterraneus</i>  | Mediterranean slimehead | Trachichthyidae  |                    |                              |
| AF369064 | <i>Gadus morhua</i>                | Atlantic cod            | Gadidae          | Gadiformes         | Percopsiformes + Gadiiformes |
| AY308787 | <i>Merluccius albidus</i>          | Offshore hake           | Merlucciidae     |                    |                              |
| AY308786 | <i>Lophius americanus</i>          | American angler         | Lophiidae        | Lophiiformes       | Percomorpha                  |
| EF095637 | <i>Lophius budegassa</i>           | Black-bellied angler    |                  |                    |                              |
| EF095640 | <i>Bedotia geayi</i>               | Red-Tailed Silverside   | Bedotiidae       | Atheriniformes     |                              |
| AY430225 | <i>Menidia menidia</i>             | Atlantic silverside     | Atherinopsidae   |                    |                              |
| AB120889 | <i>Oryzias latipes</i>             | Japanese rice fish      | Adrianichthyidae | Beloniformes       |                              |
| EF095641 |                                    |                         |                  |                    |                              |
| AY308771 | <i>Scomberesox saurus</i>          | Atlantic saury          | Scomberesocidae  |                    |                              |
| EF033040 | <i>Fundulus heteroclitus</i>       | Mummichog               | Fundulidae       | Cyprinodontiformes |                              |
| DQ235860 | <i>Priapella compressa</i>         | Palenque priapella      | Poeciliidae      |                    |                              |
| DQ235866 | <i>Xiphophorus gordonii</i>        | Northern platyfish      |                  |                    |                              |
| DQ235880 | <i>Xiphophorus maculatus</i>       | Southern platyfish      |                  |                    |                              |
| AF369065 | <i>Mugil cephalus</i>              | Flathead mullet         | Mugilidae        | Mugiliformes       |                              |
| EF095639 |                                    |                         |                  |                    |                              |
| AY308783 | <i>Mugil curema</i>                | White mullet            |                  |                    |                              |
| EF033039 | <i>Gasterosteus aculeatus</i>      | Threespine stickleback  | Gasterosteidae   | Gasterosteiformes  |                              |
| AY308776 | <i>Zebrafish</i>                   | Twotone tang            | Acanthuridae     | Perciformes        |                              |
| EF095646 | <i>Parambassis ranga</i>           | Indian glassy fish      | Ambassidae       |                    |                              |
| AY763773 | <i>Anabas testudineus</i>          | Climbing perch          | Anabantidae      |                    |                              |
| AY763776 | <i>Ctenopoma pellegrini</i>        | ctenopoma               |                  |                    |                              |
| AY763777 | <i>Microctenopoma fasciolatum</i>  | Banded ctenopoma        |                  |                    |                              |
| AY763778 | <i>Sandelia capensis</i>           | Cape kurper             |                  |                    |                              |
| AY308785 | <i>Antigonia capros</i>            | Deepbody boarfish       | Caproidae        |                    |                              |
| EF095638 | <i>Capros aper</i>                 | Boarfish                |                  |                    |                              |

|          |                                    |                          |                |
|----------|------------------------------------|--------------------------|----------------|
| EF095654 | <i>Parastromateus niger</i>        | Black pomfret            | Carangidae     |
| AY430227 | <i>Lepomis macrochirus</i>         | Bluegill sunfish         | Centrarchidae  |
| EF095677 | <i>Psenopsis anomala</i>           | Melon seed               | Centrolophidae |
| EF095649 | <i>Centropomus medius</i>          | Blackfin snook           | Centropomidae  |
| EF095655 | <i>Chaetodon semilarvatus</i>      | Bluecheek butterflyfish  | Chaetodontidae |
| AY308775 | <i>Chaetodon striatus</i>          | Banded butterflyfish     |                |
| AY763786 | <i>Channa bleheri</i>              | Snake-head               | Channidae      |
| AY763788 | <i>Parachanna obscura</i>          | Snake-head               |                |
| DQ012245 | <i>Astatotilapia burtoni</i>       | Cichlid                  | Cichlidae      |
| EF095671 | <i>Astronotus ocellatus</i>        | Oscar                    |                |
| EF095672 | <i>Etroplus maculatus</i>          | Orange chromide          |                |
| DQ012233 | <i>Haplochromis paludinos</i>      | Cichlid                  |                |
| DQ012226 | <i>Lamprologus mocquardi</i>       | Cichlid                  |                |
| DQ012220 | <i>Melanochromis auratus</i>       | Golden mbuna             |                |
| DQ012249 | <i>Metriaclima zebra</i>           | Zebra mbuna              |                |
| DQ012223 | <i>Oreochromis tanganyicae</i>     | Cichlid                  |                |
| EF095653 | <i>Coryphaena sp.</i>              | dolphinfish              | Coryphaenidae  |
| AY308772 | <i>Drepane punctata</i>            | Spotted sicklefish       | Drepaneidae    |
| AY308784 | <i>Elassoma evergladei</i>         | Everglades pygmy sunfish | Elassomatidae  |
| EF095670 | <i>Embiotoca jacksoni</i>          | Black perch              | Embiotocidae   |
| AY208615 | <i>Embiotoca lateralis</i>         | Striped seaperch         |                |
| AY308773 | <i>Chaetodipterus faber</i>        | Atlantic spadefish       | Ephippidae     |
| EF095663 | <i>Eucinostomus gula</i>           | Jenny mojarra            | Gerreidae      |
| EF095666 | <i>Gerres cinereus</i>             | Yellow fin mojarra       |                |
| AY846564 | <i>Aruma histrio</i>               | Slow goby                | Gobiidae       |
| AY846500 | <i>Elacatinus inornatus</i>        | Inornate goby            |                |
| AY846511 | <i>Ginsburgellus novemlineatus</i> | Nineline goby            |                |
| AY846562 | <i>Gobiosoma bosc</i>              | Naked goby               |                |
| AY846561 | <i>Risor ruber</i>                 | Tusked goby              |                |
| EF095661 | <i>Haemulon aurolineatum</i>       | Tomtate grunt            | Haemulidae     |
| AY763779 | <i>Helostoma temminckii</i>        | Kissing gourami          | Helostomatidae |
| AY208617 | <i>Halichoeres melanurus</i>       | Tail-spot wrasse         | Labridae       |
| EF095669 | <i>Labrus bergylta</i>             | Ballan wrasse            |                |
| AF369066 | <i>Lates calcarifer</i>            | Barramundi               | Latidae        |
| EF033042 | <i>Lutjanus analis</i>             | Mutton snapper           | Lutjanidae     |
| EF095659 | <i>Mene maculata</i>               | Moonfish                 | Menidae        |
| EF095651 | <i>Dicentrarchus labrax</i>        | European seabass         | Moronidae      |
| EF095650 | <i>Lateolabrax japonicus</i>       | Japanese seaperch        |                |

|          |                                      |                                |                |                   |
|----------|--------------------------------------|--------------------------------|----------------|-------------------|
| AY308767 | <i>Morone chrysops</i>               | White bass                     |                |                   |
| EF095658 | <i>Mullus surmuletus</i>             | Striped red mullet             | Mullidae       |                   |
| AY330979 | <i>Nandus nandus</i>                 | Gangetic leafish               | Nandidae       |                   |
| AF519728 | <i>Betta splendens</i>               | Siamese fighting fish          | Osphronemidae  |                   |
| AF519737 | <i>Macropodus opercularis</i>        | Paradise fish                  |                |                   |
| AF519738 | <i>Pseudosphromenus cupanus</i>      | Spiketail paradisefish         |                |                   |
| AF519734 | <i>Trichogaster leerii</i>           | Pearl gourami                  |                |                   |
| AY430226 | <i>Etheostoma caeruleum</i>          | Rainbow darter                 | Percidae       |                   |
| AY308768 | <i>Perca flavescens</i>              | Yellow perch                   |                |                   |
| AY208624 | <i>Abudefduf saxatilis</i>           | Sergeant major                 | Pomacentridae  |                   |
| AY208625 | <i>Acanthochromis polyacanthus</i>   | Spiny chromis                  |                |                   |
| AY208628 | <i>Amphiprion akindynos</i>          | Barrier reef anemonefish       |                |                   |
| AY208640 | <i>Chromis chromis</i>               | Damselfish                     |                |                   |
| AY208649 | <i>Dascyllus aruanus</i>             | Whitetail dascyllus            |                |                   |
| EF095673 | <i>Pomacentrus pavo</i>              |                                |                |                   |
| AY208632 | <i>Premnas biaculeatus</i>           | Spinecheek anemonefish         |                |                   |
| EF095675 | <i>Scarus psittacus</i>              | Common parrotfish              | Scaridae       |                   |
| EF095668 | <i>Scatophagus argus</i>             | Spotted scat                   | Scatophagidae  |                   |
| EF095660 | <i>Cynoscion regalis</i>             | Gray weakfish                  | Sciaenidae     |                   |
| EF095676 | <i>Scomberomorus commerson</i>       | Narrow-barred Spanish mackerel | Scombridae     |                   |
| EF095645 | <i>Holanthias chrysostictus</i>      |                                | Serranidae     |                   |
| AY308777 | <i>Siganus doliatus</i>              | Barred spinefoot               | Siganidae      |                   |
| EF095657 | <i>Sparus aurata</i>                 | Gilthead seabream              | Sparidae       |                   |
| EF095652 | <i>Toxotes chatareus</i>             | Spotted archerfish             | Toxotidae      |                   |
| AY430224 | <i>Trinectes maculatus</i>           | Hogchoker                      | Achiridae      | Pleuronectiformes |
| AY308769 | <i>Bothus lunatus</i>                | Plate fish                     | Bothidae       |                   |
| AY454396 | <i>Hippoglossus hippoglossus</i>     | Atlantic halibut               | Pleuronectidae |                   |
| AF369067 | <i>Pseudopleuronectes americanus</i> | Winter flounder                |                |                   |
| EF095644 | <i>Solea solea</i>                   | Common sole                    | Soleidae       |                   |
| AY308774 | <i>Peristedion miniatum</i>          | Armored searobin               | Peristediidae  | Scorpaeniformes   |
| EF095642 | <i>Scorpaena onaria</i>              |                                | Scorpaenidae   |                   |
| AY359221 | <i>Ophisternon aenigmaticum</i>      | Obscure swamp eel              | Synbranchidae  | Synbranchiformes  |
| AY359218 | <i>Synbranchus marmoratus</i>        | Marbled swamp eel              |                |                   |
| AY700346 | <i>Anoplocapros inermis</i>          | Eastern smooth boxfish         | Aracanidae     | Tetraodontiformes |
| AY700348 | <i>Aracana ornata</i>                | Ornate cowfish                 |                |                   |

|          |                                    |                            |                   |           |           |
|----------|------------------------------------|----------------------------|-------------------|-----------|-----------|
| AY700308 | <i>Balistes caprisus</i>           | Grey triggerfish           | Balistidae        |           |           |
| AY700320 | <i>Balistoides viridescens</i>     | Titan triggerfish          |                   |           |           |
| AY700313 | <i>Melichthys niger</i>            | Black triggerfish          |                   |           |           |
| AY700321 | <i>Sufflamen chrysopterus</i>      | Halfmoon triggerfish       |                   |           |           |
| AY700324 | <i>Allomycterus pilatus</i>        | Deepwater burrfish         | Diodontidae       |           |           |
| AY700325 | <i>Diodon holocanthus</i>          | Long-spine porcupinefish   |                   |           |           |
| AY700326 | <i>Chilomycterus schoepfi</i>      | Striped burrfish           |                   |           |           |
| AY308792 | <i>Masturus lanceolatus</i>        | Sharptail mola             | Molidae           |           |           |
| AY700328 | <i>Mola mola</i>                   | Ocean sunfish              |                   |           |           |
| AY700331 | <i>Aluterus scriptus</i>           | Scrawled filefish          | Monacanthidae     |           |           |
| AY700333 | <i>Cantherhines pullus</i>         | Orangespotted filefish     |                   |           |           |
| AY700334 | <i>Monacanthus ciliatus</i>        | Fringed filefish           |                   |           |           |
| AY700340 | <i>Nelusetta ayraudi</i>           | Chinaman-leatherjacket     |                   |           |           |
| AY700344 | <i>Lactophrys triqueter</i>        | Smooth trunkfish           | Ostraciidae       |           |           |
| AY308794 | <i>Tetrosomus concatenatus</i>     | Triangular boxfish         |                   |           |           |
| AY700367 | <i>Arothron hispidus</i>           | White-spotted puffer       | Tetraodontidae    |           |           |
| AY700358 | <i>Canthigaster bennetti</i>       | Bennett's sharpnose puffer |                   |           |           |
| AY700351 | <i>Canthigaster rostrata</i>       | Caribbean sharpnose-puffer |                   |           |           |
| AY700365 | <i>Lagocephalus laevigatus</i>     | Smooth puffer              |                   |           |           |
| AY700364 | <i>Monotreta leiurus</i>           |                            |                   |           |           |
| AY308795 | <i>Sphoeroides dorsalis</i>        | Marbled puffer             |                   |           |           |
| AF108420 | <i>Takifugu rubripes</i>           | Torafugu                   |                   |           |           |
| AY700355 | <i>Tetraodon fluviatilis</i>       | Green pufferfish           |                   |           |           |
| AY308789 | <i>Trixiphichthys weberi</i>       | Blacktip tripodfish        | Triacanthidae     |           |           |
| AY308788 | <i>Triacanthodes anomalus</i>      | Spikefish                  | Triacanthodidae   |           |           |
| AY308779 | <i>Cyttus traversi</i>             | King dory                  | Cyttidae          | Zeiformes | Zeiformes |
| AY308780 | <i>Grammicolepis brachiusculus</i> | Thorny tinselfish          | Grammicolepididae |           |           |
| AY308781 | <i>Alloctytus verrucosus</i>       | Warty oreo                 | Oreosomatidae     |           |           |
| AY308778 | <i>Zenopsis conchifer</i>          | Silvery John dory          | Zeidae            |           |           |
